# Supplementary material for: Multiple Treatment Interruptions and Protecting HIV-Specific CD4 T-Cells Enables Durable CTL Response and Viral Control
Source: bioRxiv or medRxiv preprint supplement (doi:10.1101/2023.10.24.23297421), 2023-10-25
Supplement: Supplementary file [file media-1.pdf]

**Multiple Treatment Interruptions and Protecting HIV-Specific CD4  
T-Cells Enables Durable CTL Response and Viral Control**

Supplementary data

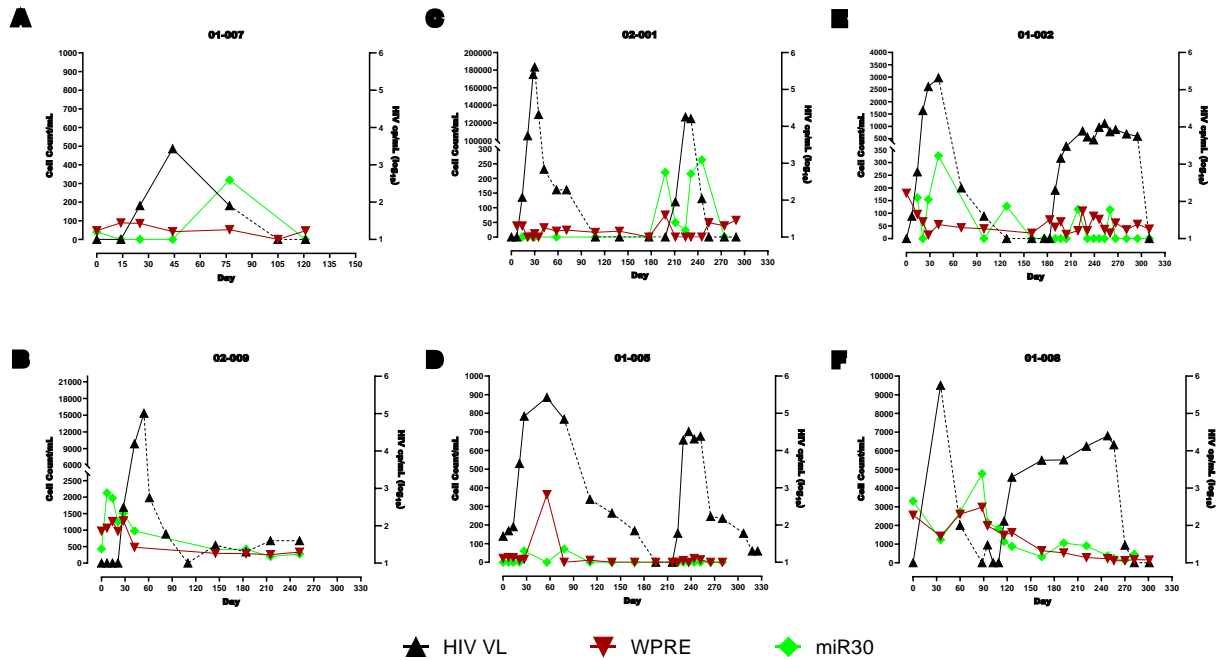

**Figure S1: Comparison of AGT103-T cells detected by two independent methods.** (A-F) AGT103-T cells detected at various timepoints during the study by two independent methods, qPCR and amplicon-sequencing in six study participants were plotted against the number of days (x-axis) and the viral load (black). The q-PCR method detected WPRE normalized against housekeeping RPL32 (red) and amplicon-seq detected the ratio of modified miR30 to native miR30 (green). The cell counts are plotted on the left-hand Y-axis while the VL is reported on the right-hand Y-axis. The solid black line indicates the VL during the ATI and the dashed black line represents the VL on ART.

**Table S1: AGT103-T cells as a proportion of circulating CD4 T cells relative to the dose and duration between the infusion and the initiation of the ATI.**

| <b>Patient ID</b> | <b>Infused Product Dose</b> | <b>Days between Infusion and the Start of ATI-1</b> | <b>AGT103-T (% of total CD4) at the Start of ATI-1</b> |
|-------------------|-----------------------------|-----------------------------------------------------|--------------------------------------------------------|
| 01-008            | 1.67 E+9                    | 150                                                 | 0.544                                                  |
| 02-009            | 1.38 E+9                    | 99                                                  | 0.220                                                  |
| 01-002            | 0.192 E+9                   | 490                                                 | 0.026                                                  |
| 02-001            | 0.62 E+9                    | 246                                                 | 0.008                                                  |
| 01-005            | 0.46 E+9                    | 411                                                 | 0.003                                                  |
| 01-007            | 0.19 E+9                    | 390                                                 | 0.009                                                  |
